# Supplementary material for: Impact of multivalent charge presentation on peptide–nanoparticle aggregation
Source: publisher site journal article supplement (doi:10.3762/bjoc.11.89), 2015-05-15
Supplement: Additional file 2 [file 1860-5397-11-89-S2.pdf]

## **Supporting Information File 2**

**for**

# **Impact of multivalent charge presentation on peptide– nanoparticle aggregation**

Daniel Schöne<sup>1</sup>, Boris Schade<sup>2</sup>, Christoph Böttcher<sup>2</sup> and Beate Kokschr\*<sup>1</sup>

Address: <sup>1</sup>Institute of Chemistry and Biochemistry - Organic Chemistry, Freie Universität Berlin,  
Takustr. 3, 14195 Berlin, Germany and <sup>2</sup>Electron Microscopy, Freie Universität Berlin,  
Fabeckstr. 36a, 14195 Berlin, Germany

Email: Beate Kokschr\* - beate.kokschr@fu-berlin.de

\*Corresponding author

## **TEM images**

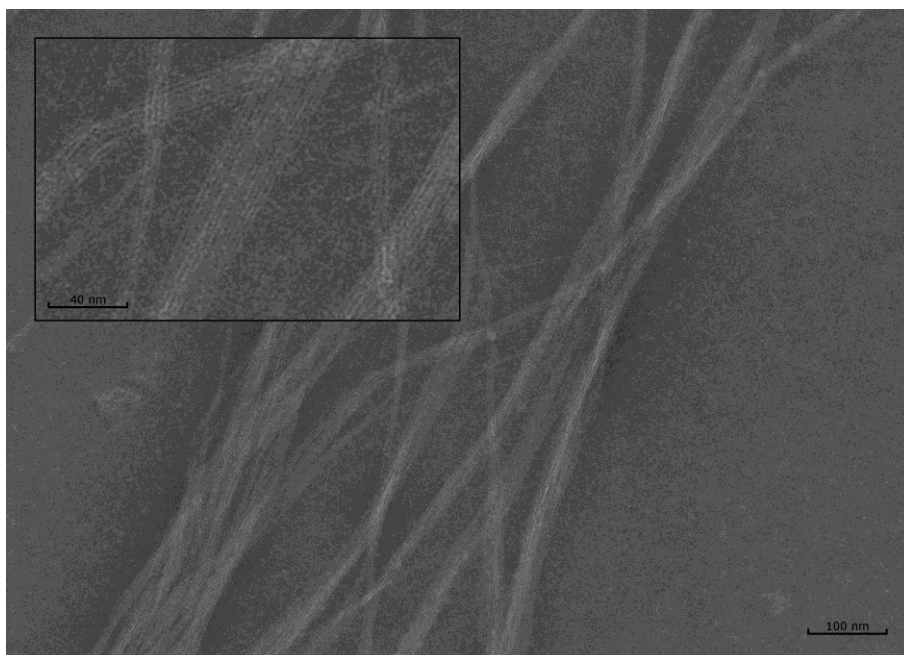

**Figure S5:** TEM of 100  $\mu$ M R1A3 in 10 mM Tris/HCl buffer pH 9. Sample was negative stained with 2 % PTA, defocus - 0.5  $\mu$ m.

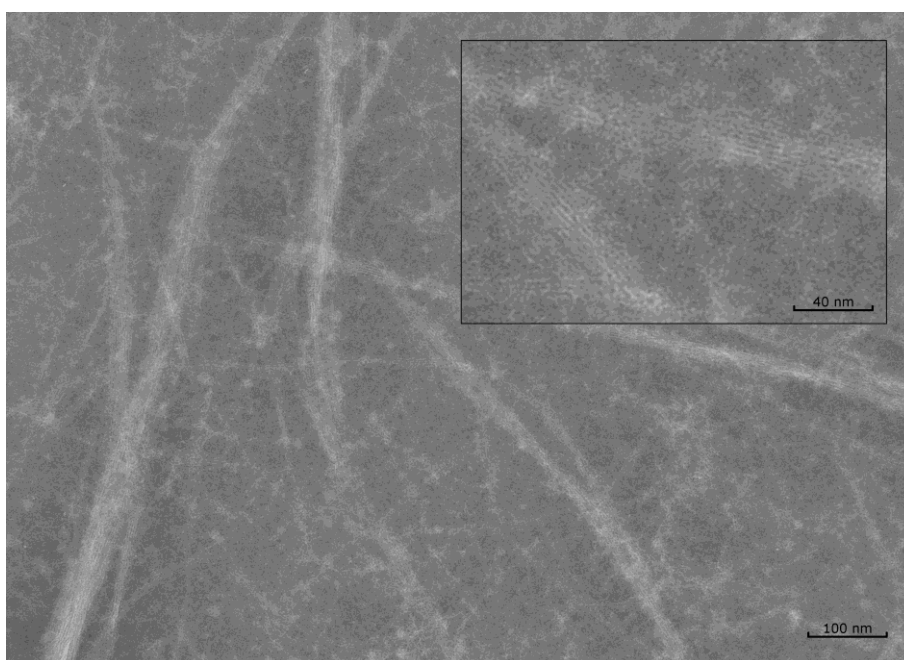

**Figure S6:** TEM of 100  $\mu$ M R2A3 in 10 mM Tris/HCl buffer pH 9. Sample was negative stained with 2 % PTA, defocus - 0.5  $\mu$ m.

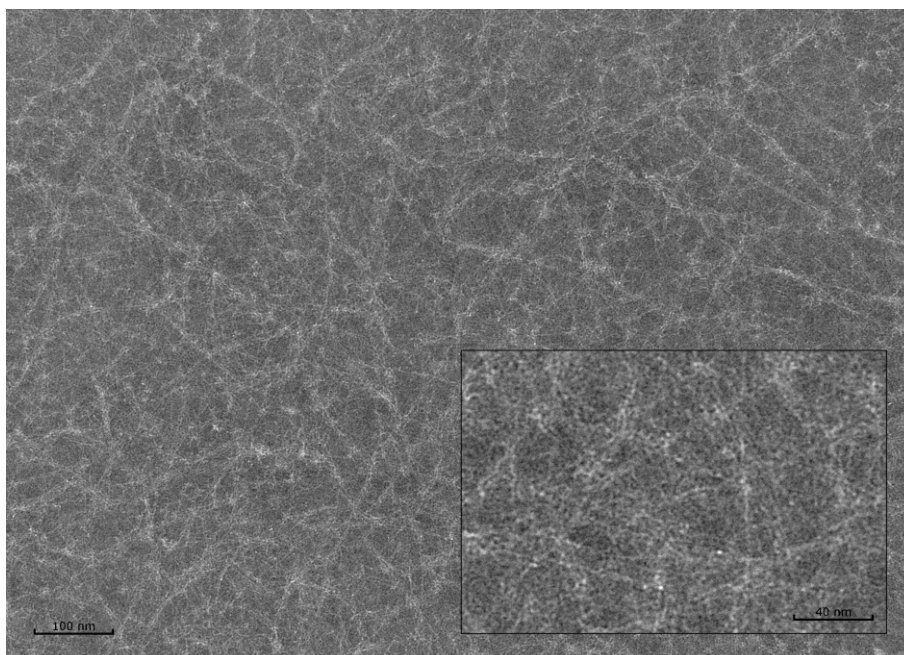

**Figure S7:** TEM of 100  $\mu$ M R2A4 in 10 mM Tris/HCl buffer pH 9. Sample was negative stained with 2 % PTA, defocus - 0.5  $\mu$ m.

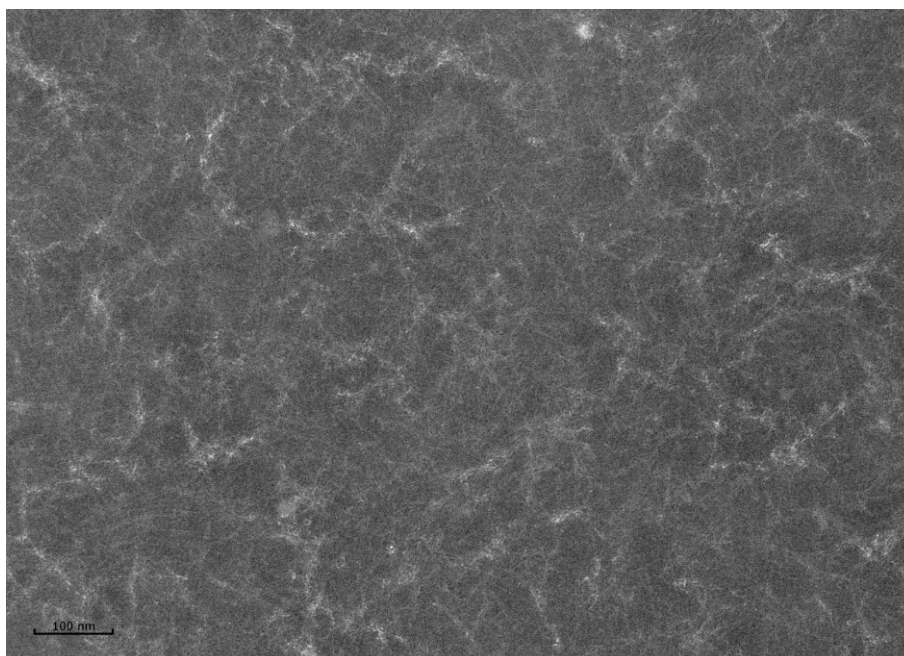

**Figure S8:** TEM of 100  $\mu$ M R2A5 in 10 mM Tris/HCl buffer pH 9. Sample was negative stained with 2 % PTA, defocus - 0.5  $\mu$ m.

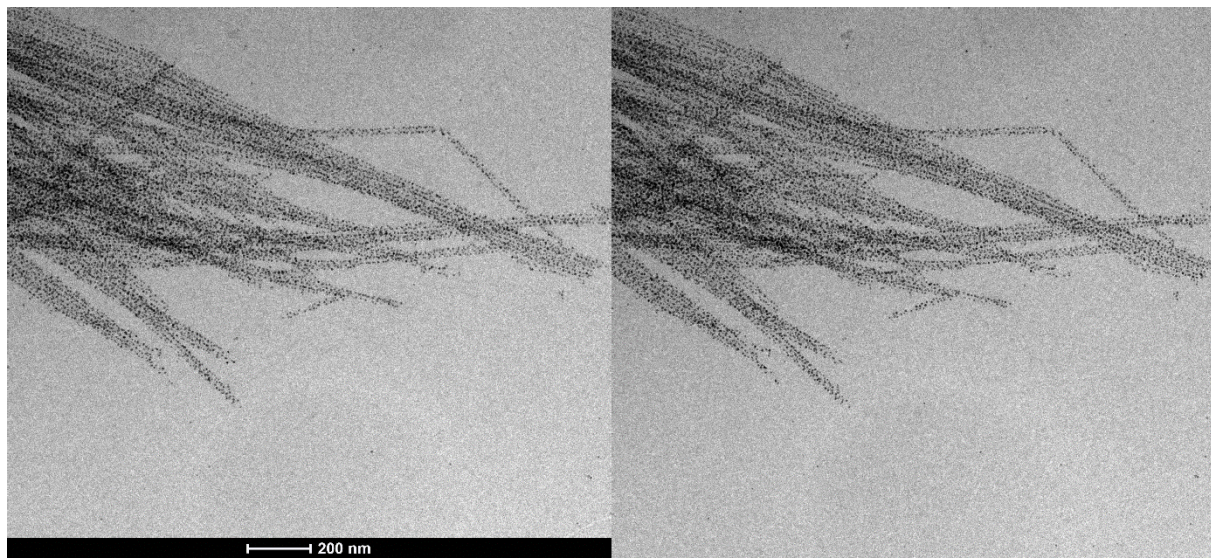

**Figure S9:** Stereo Cryo TEM of 100  $\mu\text{M}$  R2A2 and 0.4  $\mu\text{M}$  Au/MUA nanoparticles in 10 mM Tris/HCl buffer pH 9.
